# Supplementary material
Source: publisher figshare collection journal article supplement (https://tandf.figshare.com/ndownloader/files/12792938)
Supplement: Supplementary file 1 [file 12792938]

## Sheet: App1 
Appendix 1: Visits to London museums, galleries and visitor attractions
This Appendix contains data used by Sara Selwood and Vicky Woollard, and includes that used by Martin Hansen.
The absence of data in this Appndix may be indicative of museums' opening dates, their closure, that no data was provided in reports, that no report was either published or available, or that the data itself was incomplete.
While many of the figures were provided for financial year, rather than calendar year, they are presented here by the latter for the sae of consistency
	Bethnal Green/ Museum of Childhood	Crystal Place	Cuming Museum	Guildhall Art Gallery	Geffrye Museum	Hampton Court Palace	Horniman Museum	Imperial War Museum, London	Kenwood House	Kew Gardens	London Zoo	Mme Tussauds	National Gallery	National Maritime Museum	Natural History Museum, London	National Portrait Gallery	Royal Academy	Science Museum	South London Gallery	St Paul's Cathederal	Tate (Tate Britain)	Tower of London	South Kensington/V&A	Wallace Collection	Westminster Abbey	Whitechapel Gallery
1851										327900	667243		1109364									485188
1852										231010	305203											77168
1853										331210	409076											100124
1854										339164	407676												104823
1855										318818	326172												78427
1856										344140	359608		1671980									50000
1857										361978	356743		891620										268291
1858										405376	351580		1584286										456288
1859										384698	364356		1924256			5305							475365
1860										425314	394906		1295335			6392							610696
1861										480070	381837		1274107			10907							604550
1862										550132	682205		2140261			17927							1241396
1863						236079				401061	468700		1376593			10475							726915
1864		1661083								473307	507169		1366369			14885							653069
1865		1758516				246600				529241	525176		1387254			16642							692954
1866		2067598				245850				488765	527349		1531976			24666							756075
1867		1807146								494909	556214		1469942			24649							646516
1868		1879252								502369	573186		1610721			25344							881076
1869		2035699								630594	572848		1804892			24416						107000	1043654
1870		2005707								586835	573004		1913564			58913							1014849
1871		2120822								577084	595917		1850987			63195							939329
1872	901464	2185307								553249	648088		1953580			67039							1156068
1873	709472	2126498								683870	713016		1695231			60047							859037
1874	530676	2178618								699426	706907		1721431			65201							914127
1875	522098	1905990								678002	699918		1636462			71740							830212
1876	938794									596865	915764		1222024			108252							1773351
1877	670214									687972	781377		1332794			79987							913701
1878	499381									725422	706713		902162			72105							884502
1879	444021									569134	643000		817500			64034							879395
1880	424409									723681	675979		1038070			76109							981693
1881	451187									836676	648694		987577		231284	84532							1017024
1882	443692									1244167	849770		930096		278027	84599							961726
1883	447752									1240489	743485		886176		277331	146187							1093810
1884	447330									1217393	745460		735460		375231	120716							963117
1885	450439									1320977	659896		883917		421350	88760							899813
1886	446722	909341								1335481	639674		842380		382742								823999
1887	409929	1322144								1146703	562898		831186		358178								788412
1888	910511	1399940								1200802	608402		591246		372802								897225
1889	426629									1486056	644579		546440		361046								874808
1890	402989									1839966	640987		581762		355682								831460
1891	458236						42808			1373753	598730		574089		375906								919573
1892	579933						36794			1354157	605718		547736		351917								957112
1893	591074						41801			1733386	662649		525722		408208								1174211
1894	595422			342631			65329			1377588	625538		542825		413572								1057279
1895	355248			323225			85807			1407369	665326		514063		446737								1040628
1896	383709			193507			62119			1396876	665004		562029		453956	214100							1135797
1897	366103			317396			90383			1239638	717755		495655		422607	162056		102352			140025		1017314
1898	392283			260611			15324			1277215	710948		492974		419004	124972		108273			274700		977305
1899	440917			283982			No visits			1197565	696707		496974		422290	122167		98739			238453		954445
1900	506248			240281			No visits			1111024	697178		565063		485288	127888		87356			248665	400000	846489	288881
1901	489052			369599			177312			1465375	725685		556227		417691	119577		89189			253270	462000	836848	323741		433000
1902	407999			220872			238859			1323376	694496		559651		433619	151352		87714			266413		855931	245741		372000
1903	378422	2571048		225859			227714			1352548	657208		539773		486733	140686		442776			275526		856943	210432		365000
1904	442137	2505590		121122			223430			1579666	706074		540349		470557	144743		438999			252199		848969	196706		340000
1905	421759			132137			195430			1824319	715480		586170		556313	168769		482075			256035		878200	181155		234884
1906	433849			180538			177086			2339496	896423		674710		472557	152712		464706			352134		843746	175984		280000
1907	413367		43400	157, 720			196964			2962714	863953		669218		497437	155372		501349			371865		925313	192362		242500
1908	396026		29253	Not given			190839			2710220	861586		759151		517043	164981		471105			331913		868362	211657		198600
1909	374074		22745	102480			207304			3360221	797058		738868		535116	174914		514954			342559		718921	201790		280000
1910	382320		134,602?	125641			178928			3546302	897461		758868		515562	175251		461930			386514		967692	191060		275000
1911	427657		26270	97657			167502			3704606	892622		821590		435684	159679		397707			353069		752570	177465		254000
1912	423659			108203			181146			3815427	1012898		635728		455613	147568		417012			351477		730151	175555		192500
1913	419972		16344	103727			198849			3792581	1157974		617892		486320	136431		345289			341952	502217	692426	157713		180000
1914	407234		17189	67808	36330		160510			4082011	1055208		343337		420914	119928		357721			168662	403239	563848	89960		93000
1915	292932		14663	110653	17356		135720			4300330	1058728		356887		433581	70299		346740			195207	225357	574577	63779		100000
1916	45000		23000	73235	9405	258904	124790			713922	1084249		283443		402673			95240			Closed	229573	650507	5158		160000
1917			30118	53869	17055	372249	128321			693327	898758		271218		423128			53279			Closed	208916	785000			93300
1918			40563	54565	15838	289531	120609			640729	855477		223030		422805			281463			Closed	268380	488993			88000
1919	198377		38145	79135	17346	285330	135541			1019479	1515042		461129		455736			405591			Closed	366698	675990
1920	259507		41714	82431	21373	301745	154706	1433891		1131771	1590642		659423		527701	131325		477522			146261	401141	941186	20750
1921	319378		33462	108818	20040	354335	137529	1079699		1236308	1386745		559218		479476	160128		445658			276055	310553	1276548	130904		58000
1922	353685		38898	80755	30886	322057	131584	907743		1143758	1427849		629243		498841	182317		494056	71830		280862	367714	913040	131903		74000
1923	371486		40490	76066	26292	294693	133162	731970		1186662	1613125		582807		492500	144876		474000	97541		293564	379200	1035880	119127		79665
1924	380089		37428	91901	27765	239634	135199	101725		1535855	2057146		755523		521901	191401		437816	72024		326824	555473	1318049	153957		61824
1925	385708		32588	94172	33633	239634	99522	224683		1671840	1823613		677738		507225	187322		429558	89758		321571	431082	1190707	162342		78304
1926	386923	1015782	34030	90624	36327	250815	148522	198172		1162547	1937935		591992		511313	173665		576734	113712		364560	390951	1103318	149859		60024
1927	367435	1029878	38658	85545	31444	285934	142983	239961		1078088	2158208		706113		569318	195335		709166	111316		456267	424634	1020006	163025		98748
1928	369928	1215953	33200	92227	35816	273065	137057	236142	175596	1127003	2250000	1062079	669408	42331	567273	176156		900053	108552		349881	440916	937577	131634		94000
1929	374745	1104211	34552	85593	25640	320289	126311	313879	174542	1169900	2047090	952839	631723	24208	541198	177123		1061754	100907		269306	445779	930463	117507		105000
1930	371834	900129	41893	89309	23047	342430	129644	283106	134007	1544212	2101438	854928	634613	26525	506407	174567		1132761	92365		297116	426235	827681	110389		114000
1931	368809	940862	43764	84907	23021		136347	318998	121216	1389184	1816052	812931	562710	28262	537170	157827		1170981	75732		276383	394303	791527	91418		124250
1932	366918	874917	52573	81588	20621		133347	298459	96790	1068395	1552535	643185	564927	25459	602918	153403		1241528	66085		256586	386240	806076	83327		128500
1933	353429	768624	58079	95175	19863		134228	295865	92017	1226057	1557791	608095	525550	20017	606712	164548		1255818	68306		269666	391843	820317	72836		83350
1934	347029	822533	50233	75964	14041		135874	307983	82114	1170369	1639611	684398	531954	21376	631782	147068		1142472	57601		262900	395299	810361	75720		99560
1935	308461	562760	42275	67507	12278		130887	212076	77381	1091220	1962136	720593	528444		666147	153497		1327190	41619		256042	385476	794886	81524		109599
1936	281725	567060	36370	64700	18688		116537	279914	75560	1128660	1962122	791374	614446		638141	151262		1281338	53924		250450	430099	859969	87021		109200
1937	287560		42227	81955	25277		104770	294301	81577	1164249	1946897	938843	620035	189810	520463	167904		1271599	30016		261369		763439	97015		90116
1938							161350	457252		1221480	1816012		628548	283537	528183	146937		1137635					736483	88101
1939								141979		1173625	1707443		370991	138702	358034	97277		712000					487000	54500
1940								65496		822928	631671			20000				76000					105000
1941										825374	512966												90000
1942										1230241	1344568				59767	75301							211000
1943										1401001	1606516				137195	137370							324000
1944										911494	724203				51017	102215							184000
1945										1364768	2200000			9676		83300							561000	48674
1946								21323		1567954	2745483			93442	56266	127829		1288000					858000	75870
1947							88831			1620960	2280007		942623	11321	298271	144092		748000			636103		608000	85766		12715
1948							84494			1721757	2335539		884106	213479	414180	147017		980000			866480	620755	912000	136900		47944
1949				64670	49763		115632			1725431	2445995	1178458	1004678	255187	502092	140219		900000	7732		553863	897000	723000	155907		58690
1950	77900			60054	43888		112219	111486	90847	1480880	3013571	1060370	936911	189058	503294	132441		1039522	24088		661545		963000	157474		54873
1951	70900			62691	6287		90270	118331	103644	1205957	1968576	910182	843629	202922	425908	132199		1024809	25101		324910		908000	120743
1952	92000			59041	24880		110733		156872	1188925	1970050	805681	849949	203509	407821	150586		1062473	21845		395876		795000	145889		40978
1953	88200			56913	45341		123588	161750	150953	1211955	1972222	964073	860518	214992	400935	153236		1062000	25135		590244		787000	135618		48103
1954				66483	46814		122054	183425	210539	1110305	2296703	950786	868085	299594	602202	144659		1200000			540681	1071000	1035000	134242		50203
1955	96050			64681	42384		113112	189282	219780	1180324	2078460	978982	875552	449863	612667	148488		1143000	16888		478197	1023100	739000	138024		57416
1956	76746			63585	42284		90721	205637	228866	987835	1948046	1068883	1192678	417461	692593	149381		1191000	22561		489654	1064400	775000	139591		65328
1957	78621			79320	44903		115452	245150	224032	1064815	1965260		1178602	450342	762626	156808		1317000	21300		517214	1091800	790000	131603		64842
1958	82716			64227	37283	489300	120211	285577	250985	946499	1879163		1174506	389839	813210	172441		1291000	16700		514505	1055000	873000	123152		43563
1959	86311			67137	38416	434000	125737	299659	272393	1270893	1955356		1154342	400561	764959	154232		1273000	19400		808327	1018621	853000	119733		43031
1960	88202			54233	38856	545000	127499	325384	283631	1082271	1833938		1147226	398094	804201	159357		1147000	25000		963503	1877800	964000	120065		61431
1961	84708			55720	38674	557000	119742	346835	276664	1202648	1887088		1318554	468892	897989	164921		1057000	18747		676943	1896000	886000	118667		33893
1962	96000			65730	41040	581000	142905	366914	276361	1080076	1640514		1547020	469572	819736	172899		1130000	27054		614772	2207500	1010000	121706		48688
1963	83400			62617	37082	603000	164089	363533	290833	979924	1778000		1236807	457466	928422	205233		1210000	17028		540311	2165400	854000	122561		62916
1964	126200			60327	37200	649000	148185	356036	344008	1007564	1816000		1230465	524189	780634	231713		1365000	21287		700781	2361600	1010300	122699		104145
1965					50463	709700	140273	394676		1026791	2126000		1486915	578986	956231	234175		1507000			758440	2851700	976900	133833		47389
1966			7070	71422	54048	680300	157864	474565	321777	982023	2003300	1200000	1520621	619243	1059149	264552		1700000	27578		905894	2846800	1111581	143642		49545
1967			10700	56276	53709	632300	178324	658557	251657	1110405	2036642	1300000	1506814	626157	1108107	261219		1910000	17500		1015608	2025700	1219253	152363		46913
1968			10800	54224	48832	646800	194631	650348	237649	1059967	2081479	1400000	1497060	699283	1331547	335136		2170000	19600		999738	2105200	1306909	143642		36856
1969	151000		10700	52613	51576	612700	204506	622036	212143	No figures	1875290	1500000	1553252	149000	1368061	322962		2126000	12500	1500000	944664	2277800	1262567	149791		35782
1970	202000		12008	38445	56072	717100	203138	597108	146016	No figures	1794400	1600000	1750477	162000	1489142	714203		2120599	18148		934900	2497900	1460082	157471		57822
1971	132000		10038	29591	50691	659600	212268	556639	163890	No figures	1941900	1700000	1838722	204000	1509949	512733		1941727	16717	3000000	935712	2660700	1785814	152889		49963
1972	126000		10583	25670	51430	535900	196771	586263	180228	1830745	1976960	1888000	1773579	34000	1517373	422894		1936242	14144	4000000	913204	2882500	1359696	135000		108511
1973	172000		9975	26144	59097	566700	208698	669348	180228	1223189	2045000	1882000	1489198	1500000	1876078	371430		2311711	16004	2500000	879132	2809888	1303083	122741		102897
1974	134407		10275	27707	54996	524300	267279	837020	195165	1161933	1958000	1820000	1629379		1701003	354968		2051908	15580	3500000	881030	2393500	925032	107358		56696
1975	162564		10607	26794	52223	466700	215000	653566	252895	1186124	1795000	1990008	2045847	1944350	2503303	349755		2404232	16969	4000000	832109	2585274	1064651	134257		75375
1976	176000		11940	21454	48576	504400	237730	635730	184911	1176173	1715000	2108708	2354056	1690000	2959000	323838		2507888	20083	577231	1202013	2585400	1245740	151074		66961
1977	233196		15250	14177	59000	554335	252665	876184	175738	1211985	1668000	2455000	2685819	1250000	3075008	534653		3360624	15650		1005324	3089400	1956142	158280	3000000	71206
1978					50229	614929	203516	795886	164056	1222559	1607000	2426520	2300109	1260653	2788824	424652		3486228			1080956	3004700	1594137	144881		65770
1979					38503	482000	205216	848341	149608	1078983	1501000	2347138	2758000	1102000	2754294	388463		3701108			1141425	1894500	1644381	128157		67347
1980	188305				39289	590583	195231	805507	156879	1037032	1339000	2157105	2618075	1145104	2285153	448690		4224027			1330937	2182100	1393182	159526	1500000	73707
1981	218671				43155	537955	205577	621387	126834	953153	1053000	1991995	2737904	996882	2680000	529608		3850000			885168	2088443	1368460	138773	1900000	57491
1982	289960				34958	538838	173196		161241	1138221	1027000	1875315	2633139	1027000	2307000	524493		3306338		2-3m	1219102	1894500	1677063	143910	2500000	50891
1983	297721				48077	524627	191725	724398	171849	1066349	1239200	1995750	2896676	500000	2534000	467746		3345822			1270925	2182000	1817757	177214	2900000	63413
1984	284000				49538	502377	174908	696286	239600	1084291	1225000	2118400	2936926	600000	2318000	581395		3019892			1265605	2341300	1577608	177613	2750000	9000
1985	307000				49567	580440	190511	544632	243709	1112177	1405000	2312534	3156725	600000	2642000	516148		2723947			980105	2430323	1644952	178770	3500000	32089
1986	333099				45363	576664	189640	434458		1147101	1199000	2390831	3182365	380099	2678000	624521		2994451			1137070	2019900	1002103	170797	3000000	66582
1987	328329				45564	543061	229484	396049	155703	1335690	1338000	2439155	3566568	442005	2500000	591906		3166294			1725084	2289354	916477	168109	3500000	98381
1988	269814				42485	580000	200000	281865	139704	1181245	1391749	2704547	3228153	707399	1600000	639795		2261048			1581467	2181707	996501	157524	3250000	49669
1989	215150		2528		32328	612155	187964	355518	166225	1206881	1122915	2609206	3368217	423858	1500000	625197		1121103			1234281	2214000	952992	129010	3250000	92961
1990	220120		11648		41038	643226	200000	411760	153299	1196346	1199922	2547447	3682223	563000	1530000	602569		1303345			1592431	2298193	962235	135866	3000000	76703
1991	224182		11981		35403	605230	192000	338301	149090	988111	1074871	2248956	4280139	587876	1600000	589982		1327503		1500000	1816421	1937857	1069428	165069	2250000	98134
1992	228707		10839		44594		176743	392098	121120		949655	2263994	4313988	506800	1480000	575480		1212504		1400000	1575637	2235199	1182402	199200	2750000	99623
1993	211439		11924		42548		200000	403373	110178		865848	2449627	3882371	504496	1730000	611257		1277417		1900000	1760091	2332468	1600000	153960	2500000	167783
1994	202357		11433		42614	571605	167406	455339	131317		962005	2631538	4301656	537754	1740000	1044149		1274253		2600000	2226399	2407115	1600000	150432	2200000	88378
1995	187254		7435		49629	526688	174148	450813	134000		984000	2703283	4469019	609008	1640000	851030		1556368		2200000	1769662	2536680	1500000	160642	2245000	111182
1996	174469		9834		55789	503627	193533	466108	150000		947000	2715000	5000000	458316	1460000	807545		1548366		2000000	2203001	2539272	1600000	183715	2500000	112375
1997	172590		9900		55308	498278	222157	491643	179469		1035741	2798801	4809063	476107	1800000	883435		1537289		964737	1757753	2615170	1400000	188124	2500000	116879
1998	182353		10964		68599	449957	220000	485061	148500		994513	2772500	4770330	473923	1824000	994712		1550211		1095299	2180665	2551459	1500000	179825	3000000	164899
1999	147268		12241		109727	473013	164461	477311			1017469	2640000	5042000	381571	1859000	996712		1480921			1823328	2428603	1265123	172179		169, 622
2000	149935		11902		90966	488197	110000	495308		860340	932878	2388000	4897690	345728	1747000	1219167		1337432			1204147	2303167	936652	237938		143129
2001	191860		9421	17901	83582	491844	113339	661804	200273	989352	910000		4918985	423474	1660000	1479179		1352649			1011716	2019210	1451621	228187	986354	113657
2002			9753	30291	80944	612078	217045	646978	133795	987266	915000		4130973	454900		1319527		2722154		781000	1178235	1940856	2123430	245722	1058854	183339
2003	229300		9190	28450	85517	549578	263665	655989	114244	1079424	815000		4360461	525600		1425655		2886850		696000	1106911	1972263	2250400	223196	1002718	107946
2004	235427		7130	29948	82955	583242	302941	672402	109268	1090445	844573		4959946	561181		1468875		2169138		713875	1088005	2139366	2011200	301782	1032273	254319
2005	123376		9191	28000	74006	525443	288653	764870	116645	1514276	813455		4202020	579854	3224740	1528638		2149856		1395044	1738520	1931093	1902600	205695	1027835	279247
2006	154233		10075		78065	563407	380362	690529	132794	1357522	883092		4562471	568585	3200645	1665449		2421473		1626034	1597359	2084468	2573100	255427	1028991	65112
2007	332844		6541		83332	566457	482138	732307	123212	1427096	1108541		4159485	0	3892878	1645680		2684945		1623881	1600000	2064126	2280800	331536	1058362	63935
2008	359354		7053		76486	598851	478185	759571	105690	1306401	1039039		4382614	587595	3779420	1833684		2705677		1687821	1618309	2161094	2128400	346980	1481150	63804
2009	391760		11499		90938	903270	596177	865601	116454	1300557	1059000		4780030	669199	3843310	1984500		2793930		1821321	1501837	2389548	2351300	362202	1449593	344048
2010	422527		10352		99667	549578	598214	886528	128783	1141973	1011257		4954914	804988	4388944	1758488		2757917		1892467	1665291	2413214	2619600	363460	1394427	336623
2011	443302		37987	61400	106957	583242	505899	1095392	123821	1188933	1090000		5260792	857997	4682783	2048168		2889000	139000	1819925	1488358	2549401	2888700	374340	1898958	332559
2012	433261		31080	73858	101547	525443	561629	976607	14856	1023501	974433		5163902	1128944	4823547	2054027		2989000		1789974	1534781	2444296	3298100	361368	2138130	290463
2012	446232		30244	78012	113511	563407	844647	704162	27334	1325917	1294483		6031574	1437725	5137490	1988449		3316000		2138130	1378272	2859000	3195400	413432	2020637	314546
2013	465736				111143	566457	870051	369880	215541	1368565	1318621		6416724	1516258	5117988	2081633		3358086		1782741	1357878	3077000	3263700	410233	1786106	308636
2014	462607			112517	111235	598851	758868	1190193	159556	1622821	1265911		5908234		5281446	2102975		3354192		1609325	1284519	2794000	3929800	440413	1664850	292746
2015	433803			100212	121886	903270	791507	1054525	134416	1828956	1211279		6262839		5199663	1879445		3245750		1519018	1081542		3000000	427755	1202000	270295

## Sheet: App2 
Appendix 2: Visits to non-London museum and galleries
ONLY THOSE USED BY MARTIN -some of his data, not included here was from adrian
	Blackburn Museum	Cartwright Hall, Bradford	Colchester Castle	Derby Museum & Art Gallery	Leicester Museum	Maidstone Museum	Museum of Science & Industry	Nottingham Castle Museum	Warrington Museum	Whitworth Art Gallery
1851
1852
1853
1854
1855
1856
1857
1858
1859
1860
1861
1862
1863
1864
1865
1866
1867
1868
1869			8714
1870			11413
1871			13969
1872			14708
1873			17234		94521
1874			16910		84053
1875			15795		75395				17765
1876			16737		79997				20744
1877			16705		81208			131899	32869
1878			15009					221849	28445
1879		26000	16018					212376	35911
1880		211498	16648					223406	33626
1881			17319						29692
1882		206732						195307	28888
1883								157339	26140
1884	69500							233844	23183
1885	54565	309593	11165		65219			210789	25550
1886	56963	336512	12028		81471			208289	30153
1887	56820	312992	14521		68499			223410	35451
1888	61050	292001	15914					239379	35204
1889	67950	328756	15983	27959				237967	37933
1890	62230	298127						254876	33802
1891	66700	329979				65514		247140	86508
1892	67100	321163				77514		230432	20890	82701
1893	42500	294637						261928	25208	142283
1894		332478						286481	21238
1895		336226						231730	19360
1896	60500	305310						261313	21298
1897	63500	398594	21000					263453	18150	115027
1898	60500	437178						268152	16155	76507
1899		364503		44539				263995	16992	83836
1900	65500	397059		37930		39208		289999	25071	128353
1901	58800	443988		38445				267082	27699	79409
1902	84500	377234		31320		32549		261185	27385	100454
1903	73000	223349	20887	43705		31500		292454	25228	103059
1904	65000		27039	36155		28898		266455	21974	87441
1905	65000		28408	39892		28256		314909	25048	74961
1906	58000		29588			29810		243827	20997	51350
1907	62600		31078			29015		332452	43114	48413
1908	69000		30875	42000				417103	57019	81980
1909	66500	600000	29842	40000				480920	40862	122948
1910	67000		34453	39975				478802	48389	114868
1911	61500		29423					430153	51443	105081
1912	51500	400000	27298	35264				332961	49621	96363
1913	54000		32149	45264				353489	50251	82387
1914	56400		29564	38981				331606	50747	82387
1915			49689	36591				269499	49349	102922
1916	41000		44810	40797				257690	52923	121805
1917			46437	29185				293438	58059	176865
1918	77600	400000	47610	36608				346481	57053
1919	68000	400000	51496	84951				374409	53964
1920	94000	400000	46144	80190				358126	55147
1921	54800		46144	104279				363633	82815	117878
1922			37947	79739				363627	110339	96689
1923	55500	400000	42860	66897	222039			391690	119204	120528
1924	40000	450000	43004	115740	231090			372542	122232	118007
1925		410000	40419	79552	241159			339908	118995	120700
1926		400000	41320	86138	269557			333602		95957
1927		400000	44853	83298	256530			316560		81522
1928	50500		46549	79848	284334			249324		83285
1929	50000		49208	113336	267833			294643
1930	48000		54419	117349	285394			275553		55535
1931	48500		52149	97129	288603			280096		47697
1932	41000		39301	128449	285958					59497
1933	55000		31041	124234	283435					65168
1934	38500		31242	101207	257177					48001
1935	40700		31627	105634	235850					45135
1936	42190		26514	96048	234550	26422				56955
1937	41951		37960	112558	245312	22988				56438
1938	36808	300000	20863	111424	234814	29721				54250
1939	34524		69226		196369	27000				33421
1940	43582		86059		122001	28904				29219
1941	36344		94352		91544	15650
1942	44756		129432		135962	28737
1943	39574		118413		150148	38216
1944	32985		132939		132702	36652
1945	28715		114748		125577	36744		460881
1946	26246		82975		117756	31433		406254		22102
1947	31144		91262		109968	31883		523572		44312
1948	39182		108065		126078	30671		428821		61231
1949	38711		112190		123703	28029		564348		62822
1950	35993		114299		153349	29748		564348		64612
1951	34903		142512		137221	38300		555686		75937
1952	36729		147501		123154	35757		460605		73973
1953	38552		141888		148666	34730		534043		70714
1954	43892		130715		134233	32208		515992		72156
1955	33237		155257		125159	50995		600354		67275
1956			176452		124560	53567				56236
1957			178108		127237	42177
1958			177768		151924	46694
1959		120374	155427		120099	51468				47267
1960		132466	165128		125466	60730				41968
1961		127001	181518		122078	70340				38440
1962		131561	140758		129291	74728				39444
1963		111613	138941		125283	83854				33482
1964		143360	154127		143705	98071				38987
1965		150000	125214		135941	97888				46319
1966		134145	0		100375					50614
1967			202772		151159					21064
1968			158791		124067					35045
1969			230147		164287					43187
1970			245000		147583		4899			38598
1971			213056		160147		10133			43976
1972			24426		132501		14800			35726
1973			42022		157345		16025			41280
1974		128617	49899				17422			43267
1975		112933					27186			43327
1976		104490					45095			64541
1977		103591				60000	62666			96006
1978		116771				60000	69902			72420
1979		96361				60000				61440
1980		95354				60000				82845
1981		84412				60000				73737
1982		117260				60000				63786
1983		90219	109166			60000	43000			72661
1984		108464	102822			44262				109729
1985		93435	103138			40844	330000			109191
1986		89008	94089			41083	295000			114364
1987		94134	87172			46870	256000			162232
1988		96056	92430			36429	240000
1989		155144	94455			37135	322000
1990		96299	92359			38854	338647
1991		115116	96687			44044	346209
1992		95653	110494			40471	333597
1993		87612	106669			47190	287913
1994		90477	102336		104522	47092	276155
1995		95708	100823		108087	50880	334661
1996		87387	113327		112420	55923	253658
1997		84701	104778		126196	52974	247046
1998		103846	113707		117676	50813	355414			131458
1999		80083	101236		111348	34193	301244			110890
2000		77601	102544		117492	36312	288968			136141
2001		70921	106234		111512	49485	389582			108545
2002	33562	71762	98264		115592	35987	434055			100738
2003	34265	85312	97314		141279	49521	381932			100333
2004	29166	67067	103691		111346	44097	492473			83858
2005	42216	62769	101220		134923	52679	411547			84559
2006	46969	141569	97150		146831	83482	408469			87579
2007	44050	101236	93116		178385	66207	819104			117139
2008	36878	86041	108996		167899	69825	852262			137729
2009	32956	37998	88337		170486	67549	568993			170089
2010	28603	45209	89383		168059	66192	568993			172442
2011		61273	88296		258061	62692	839000			178996
2012		47697	77277			81417				172704
2012
2013
2014
2015
2016
2017
